# Supplementary material for: Effects of UV/PMS oxidation on the degradation of zidovudine: kinetics, degradation products, and reaction pathways
Source: Royal Society of Chemistry journal article supplement (doi:10.1039/d5ew00648a), 2025-11-21
Supplement: d5ew00648a1.pdf [file d5ew00648a1.pdf]

**Supplementary Information**

*for*

**Effects of UV/PMS oxidation on the degradation of zidovudine: kinetics,  
degradation products, and reaction pathways**

**Zhenqi Du <sup>a,1</sup>, Yiran Jia <sup>a,1</sup>, Zhangbin Pan <sup>b</sup>, Xiaohong Wang <sup>a</sup>, Baozhen Liu <sup>a</sup>,  
Guifang Li <sup>b</sup>, Yonglei Wang <sup>a,\*</sup>, Ruibao Jia <sup>a,\*</sup>**

<sup>a</sup> School of Municipal and Environmental Engineering, Shandong Jianzhu University, Jinan,  
250101, China;

<sup>b</sup> Shandong Provincial Water Supply and Drainage Monitoring Centre, Jinan, 250101, China.

\*Corresponding author: Y. Wang.

E-mail address: [wyl1016@sdjzu.edu.cn](mailto:wyl1016@sdjzu.edu.cn) (Y. Wang)

Address: Room 301, Prefabricated Teaching and Experimental Complex Building of Shandong  
Jianzhu University, 1000 Fengming Road, Licheng District, Jinan, 250100, China.

<sup>1</sup> These authors contributed to the work equally and should be regarded as co-first authors.

|    |           |
|----|-----------|
| 23 | 30 Pages  |
| 24 | 1 Text    |
| 25 | 6 Figures |
| 26 | 10 Tables |
| 27 |           |

## 28 Contents

|    |                                                                                                                             |    |
|----|-----------------------------------------------------------------------------------------------------------------------------|----|
| 29 | Test S1. Methods of analysis .....                                                                                          | 4  |
| 30 | Figure S1. Schematic (a) and photographic (b) drawings of parallel beam device. ....                                        | 12 |
| 31 | Figure S2. Light Source Spectral Test Report .....                                                                          | 13 |
| 32 | Figure S3. Quasi-primary fitting curves of AZT degradation by different UV advanced oxidation                               |    |
| 33 | techniques and quasi-primary fitting curves of AZT degradation under UV/PMS system. ....                                    | 14 |
| 34 | Figure S4. Removal of AZT in the PMS system .....                                                                           | 15 |
| 35 | Figure S5. Variation of AZT absorbance at different pH with wavelength $\lambda$ .....                                      | 16 |
| 36 | Figure S6. Contribution of $\text{SO}_4^{\cdot-}$ , $\text{OH}^{\cdot}$ , and UV to AZT degradation in UV/PMS systems ..... | 17 |
| 37 | Table S1. Degradation rates of 4-MBC and EHMC by different advanced oxidation processes....                                 | 18 |
| 38 | Table S2. Experiment main target organic matter .....                                                                       | 19 |
| 39 | Table S3. Experimental reagents .....                                                                                       | 20 |
| 40 | Table S4. Main instruments and equipment .....                                                                              | 22 |
| 41 | Table S5. L16(42)Orthogonal design and results table .....                                                                  | 24 |
| 42 | Table S6. Water quality parameters of filtered water effluent.....                                                          | 25 |
| 43 | Table S7. Degradation products.....                                                                                         | 26 |
| 44 | Table S8. Signal intensity .....                                                                                            | 27 |
| 45 | Table S9. Toxicity classifications and ranges (based on GHS).....                                                           | 28 |
| 46 | Table S10. AZT and its products log KOW, acute toxicity, chronic toxicity assessment values (based                          |    |
| 47 | on ECOSAR software).....                                                                                                    | 29 |
| 48 | References .....                                                                                                            | 30 |

49

50

51

52

53

54

55

56

57

58

59

60

61

## 62 **Test S1.** Methods of analysis

### 63 1. Detection methods for routine indicators

64 The main conventional indicators involved in this study include turbidity, pH, conductivity,  
65 UV<sub>254</sub>, hardness, nitrate-nitrogen, nitrite-nitrogen, sulfate, chloride, ammonia nitrogen, total organic  
66 carbon (TOC), and dissolved organic carbon (DOC). Among them, TOC is directly detected by a  
67 Shimadzu TOC analyzer. For DOC detection, the water samples need to be filtered through a 0.45-  
68 µm filter membrane before being analyzed using the instrument. The pH value is measured by an  
69 FE28 pH meter. The detection of UV<sub>254</sub> is carried out using a UV-2700 UV spectrophotometer. The  
70 turbidity value is obtained by a 2100N turbidimeter. Conductivity is detected with a DDS-307A  
71 conductivity meter. Nitrate-nitrogen, nitrite-nitrogen, sulfate, chloride, and ammonia nitrogen are  
72 determined according to Methods for Monitoring and Analyzing Water and Wastewater (please  
73 specify the edition number). The detection of hardness (expressed as CaCO<sub>3</sub>) refers to Standard Test  
74 Methods for Drinking Water (GB/T 5750.4 - 2006).

### 75 2. Determination of AZT and its products

#### 76 (1) Preparation of AZT stock solution

77 An appropriate amount of AZT standard (purity ≥ 98%, determined by HPLC) was accurately  
78 weighed and dissolved in Milli-Q ultrapure water. After stirring until fully dissolved, the solution  
79 was diluted to the required concentration to prepare a stock solution. This stock solution was stored  
80 in amber containers (to protect against light exposure, as AZT is photosensitive) and refrigerated at  
81 4°C for subsequent use.

#### 82 (2) Detection methods

83 The concentration of AZT was determined using a Waters Acquity Arc high-performance  
84 liquid chromatograph. The chromatographic column model was InerSustain C18 (4.6 mm × 250  
85 mm, 5 µm). The separation speed of the chromatographic column was 0.5 mL·min<sup>-1</sup>, and the column  
86 temperature was 25 °C. Methanol and water were used as the mobile phase in a ratio of 40:60. The  
87 detection wavelength was set at 265 nm, and the injection volume was 10 µL. The retention time of  
88 AZT was 7.3 min.

89 The degradation products of AZT were determined using an Agilent ultra-high-pressure liquid

90 chromatography-quadrupole time-of-flight mass spectrometer. The flow rate was set at  $0.3 \text{ mL} \cdot \text{min}^{-1}$ ,  
91 <sup>1</sup>, and the injection volume was  $5 \text{ } \mu\text{L}$ . The chromatographic column was Waters BEH C18 ( $2.1 \times$   
92  $100 \text{ mm}$ ,  $1.7 \text{ } \mu\text{m}$ ). Mobile phase A was a 0.1% formic acid aqueous solution, and mobile phase B  
93 was an acetonitrile solution. The ratio of mobile phase A to mobile phase B was 9:1 from 0 to 2  
94 min, 0:100 from 15 to 20 min, and 9:1 from 21 to 30 min. The mass spectrometry scanning range  
95 for the first stage was 50–500 m/z. The sheath gas temperature was  $350 \text{ }^{\circ}\text{C}$ , the sheath gas flow rate  
96 was  $12 \text{ L} \cdot \text{min}^{-1}$ , and the voltage was 4000 V.

### 97 3. Determination of nitrobenzene (NB) concentration

#### 98 (1) Pretreatment

99 In the section on determining the secondary reaction rates of  $\text{SO}_4^{\bullet-}$  and  $\text{OH}^{\bullet}$  with AZT, NB is  
100 required as a free radical probe <sup>1</sup>. During the experiment, at six time points (0, 11.85, 23.68, 35.53,  
101 47.38, and 59.23 min), 100 mL of the reaction solution was completely transferred to amber glass  
102 bottle, and 1 mL of  $\text{Na}_2\text{S}_2\text{O}_3$  solution was added each time. A total of six experiments were  
103 conducted, resulting in six bottles of 101 mL of the solution to be extracted. In this study, a fully  
104 automated solid-phase extractor was used to replace the aqueous solvent of the NB samples to be  
105 tested with dichloromethane ( $\text{CH}_2\text{Cl}_2$ ) to facilitate gas-phase detection. The extraction columns used  
106 were HLB-type adsorbent columns (6 cc/200 mg,  $30 \text{ } \mu\text{m}$ ) manufactured by Waters, which are  
107 disposable columns. The main process of solid-phase extraction is as follows: The extraction  
108 column was activated sequentially with 10 mL of  $\text{CH}_2\text{Cl}_2$  and 5 mL of ultrapure water. Then, 101  
109 mL of the solution to be extracted was loaded onto the instrument at a flow rate of  $6 \text{ mL} \cdot \text{min}^{-1}$ .  
110 Subsequently, the extraction column was rinsed with 10 mL of ultrapure water. After nitrogen  
111 stripping for 20 min, 5 mL of  $\text{CH}_2\text{Cl}_2$  was used for elution, and the concentrated solution was  
112 collected. Finally, a nitrogen blowing instrument was used to concentrated to near dryness, and it  
113 was then dissolved to a volume of 5 mL with  $\text{CH}_2\text{Cl}_2$ . The solution was placed in a refrigerator at 4  
114  $^{\circ}\text{C}$ , and the determination was completed within 24 h.

#### 115 (2) Gas chromatography

116 The NB concentration in the solution to be tested was detected using an Agilent 7890A gas  
117 chromatograph. The chromatographic column was an HP - 5.5% Phenyl Methyl Siloxan capillary  
118 column ( $30 \text{ m} \times 320 \text{ } \mu\text{m} \times 0.25 \text{ } \mu\text{m}$ ). The carrier gas was nitrogen. Split injection was adopted with

119 a split ratio of 5:1. The split flow rate was  $5 \text{ mL} \cdot \text{min}^{-1}$ , the septum purge flow rate was  $3 \text{ mL} \cdot \text{min}^{-1}$ ,  
120 and the make-up gas flow rate was  $60 \text{ mL} \cdot \text{min}^{-1}$ . The initial temperature of the column oven was  
121  $100 \text{ }^{\circ}\text{C}$  and was maintained for 2 min. Then, the temperature was increased to  $200 \text{ }^{\circ}\text{C}$  at a rate of  $10$   
122  $^{\circ}\text{C} \cdot \text{min}^{-1}$  and maintained for 4 min. The temperatures of the injection port and the detector were  $240$   
123  $^{\circ}\text{C}$  and  $330 \text{ }^{\circ}\text{C}$ , respectively.

#### 124 4. Determination of atrazine (ATZ) concentration

##### 125 (1) Pretreatment

126 In the section on determining the secondary reaction rate of  $\text{SO}_4^{\cdot-}$  and AZT, ATZ is required  
127 as a free radical probe. During the experiment, at six time points (0, 11.85, 23.68, 35.53, 47.38, and  
128 59.23 min), 100 mL of the reaction solution was completely taken out and transferred to brown  
129 reagent bottles, and 1 mL of  $\text{Na}_2\text{S}_2\text{O}_3$  solution was added respectively. A total of six experiments  
130 were carried out, resulting in six bottles of 101 mL of the solution to be extracted.

131 In this study, a fully automated solid-phase extractor was used to replace the aqueous solvent  
132 of the NB samples to be tested with dichloromethane ( $\text{CH}_2\text{Cl}_2$ ) to facilitate gas-phase detection. The  
133 extraction column used was the HLB-type adsorbent column (6 cc/200 mg,  $30 \text{ }\mu\text{m}$ ) produced by  
134 Waters. The main process of solid-phase extraction was as follows: The extraction column was  
135 activated sequentially with 5 mL of  $\text{CH}_2\text{Cl}_2$  and 5 mL of ultrapure water. Then, 101 mL of the  
136 solution to be extracted was loaded onto the instrument at a flow rate of  $6 \text{ mL} \cdot \text{min}^{-1}$ . Subsequently,  
137 the extraction column was rinsed with 10 mL of ultrapure water. After nitrogen stripping for 20 min,  
138 5 mL of  $\text{CH}_2\text{Cl}_2$  was used for elution and the concentrated solution was collected. The concentrated  
139 solution was blown to a trace amount using a nitrogen blowing instrument and then diluted to 5 mL  
140 with  $\text{CH}_2\text{Cl}_2$ . The solution was placed in a refrigerator at  $4 \text{ }^{\circ}\text{C}$ , and the determination was completed  
141 within 24 h.

##### 142 (2) Gas chromatography

143 The concentration of ATZ in the solution to be tested was detected using a Thermo Fisher  
144 Trace DSQ gas chromatography-mass spectrometry (GC-MS) instrument. the gas chromatographic  
145 column was an HP-5MS capillary column was HP-5MS ( $30 \text{ m} \times 0.25 \text{ mm}$ ,  $0.25 \text{ }\mu\text{m}$ ). The carrier  
146 gas flow rate was set at  $1 \text{ mL} \cdot \text{min}^{-1}$ , and splitless injection was used. The temperature of the injection  
147 port was  $230 \text{ }^{\circ}\text{C}$ , and the injection volume was  $1.0 \text{ }\mu\text{L}$ . The temperature programming was as

148 follows: The initial temperature was set at 45 °C and maintained for 1.0 min. Then, the temperature  
149 was increased to 130 °C at a rate of 40 °C·min<sup>-1</sup>, followed by an increase to 180 °C at a rate of 12  
150 °C·min<sup>-1</sup>. Finally, the temperature was increased to 240 °C at a rate of 7 °C·min<sup>-1</sup> and maintained  
151 for 3 min. For the mass spectrometry conditions, the temperatures of the ion source and the interface  
152 were 230 °C and 260 °C, respectively. The selected ion monitoring (SIM) mode was set, and the  
153 mass-to-charge ratios (m/z) of the quantitative ions were 95, 112, 200, and 215, respectively. The  
154 solvent delay was 4.4 min.

## 155 5. Detection of natural organic matter

156 The separation and qualitative analysis of natural organic matter were carried out with a liquid  
157 chromatography-organic carbon detector (LC-OCD), a large-scale water quality analysis instrument  
158 developed by Dr. Stefan Huber (Germany). The detection principle relies on the separation of the  
159 molecular weights of organic matter by size exclusion chromatography. In addition to the OCD  
160 detector, a ultraviolet detector (UVD) with a wavelength of 254 nm and an organic nitrogen detector  
161 (OND) can be added to the equipment for the detection of corresponding indicators. During the  
162 detection, each sample takes 70 minutes, and the injection volume is set at 1000 uL. Finally, data  
163 were calculated using the instrument's proprietary software, followed by manual integration to  
164 obtain the detection results.

## 165 6. Detection of fluorescent organics

166 Fluorescent organic matter was detected using a three-dimensional excitation-emission matrix  
167 (3D-EEM) fluorescence spectrometer, whose full English name is Excitation Emission Matrix  
168 Spectra. It is widely used in the detection of fluorescent components in samples such as natural  
169 water bodies and wastewater effluents <sup>2</sup>. The F-2700 instrument manufactured by Hitachi Company  
170 of Japan was used for the detection. During the detection, 50 mL of the sample was first taken and  
171 filtered through a 0.45 µm membrane filter. After thorough mixing, an appropriate volume of the  
172 filtrate was transferred to a quartz cuvette, which was then put into the instrument. The widths of  
173 the excitation and emission slits were set to 5 nm and 3 nm, respectively. The ranges of excitation  
174 and emission were set to 200–450 nm and 200–550 nm, respectively. The scanning speed was set  
175 to 1200 nm·min<sup>-1</sup>, and the interval was 5 nm for both. After the detection was completed, the 3D-  
176 EEM spectra were processed using Origin software.

## 177 7. Sterilization by-product precursor testing

178 The detection of disinfection byproduct precursors determined by the total yield of the  
179 corresponding disinfection byproducts in the water body after adding sufficient chlorine to the water  
180 sample and allowing it to react for a sufficient time<sup>3</sup>. Before chlorination, the pH value of the water  
181 sample needs to be adjusted to  $7.0 \pm 0.2$  with a phosphate buffer solution. Take 30 mL of the water  
182 sample into a brown bottle, and sodium hypochlorite was added at 3–5 times the TOC concentration  
183 of the water sample of the water sample, so that the concentration of free residual chlorine is in the  
184 range of  $3\text{--}5 \text{ mg}\cdot\text{L}^{-1}$  at the end of chlorination. After the water sample is shaken well, it is placed  
185 in an incubator at  $25\text{ }^{\circ}\text{C}$  in a dark environment for incubated at  $25\text{ }^{\circ}\text{C}$  in the dark with the following  
186 reaction times. The chlorination time for the precursors of trihalomethanes (THMs) is 72 h, and the  
187 chlorination times for the precursors of haloacetic acids (HAAs), haloacetonitriles (HANs), and  
188 halonitromethanes (HNMs) are all 24 h. At the end of chlorination, pre-weighed excess ascorbic  
189 acid was rapidly added to quench residual chlorine to the brown bottle, and the bottle is capped and  
190 shaken well.

191 (1) For the detection of the precursors of trihalomethanes (THMs), the instrument used to detect  
192 the THMs generated in the water sample is the Shimadzu GC-2010 gas chromatograph. Analysis  
193 was performed according to GB/T 5750.8 - 2006. 10 mL of sample was added to headspace vials  
194 used for detection is 10 mL. Chromatographic column: HP-5 capillary column column ( $30.0 \text{ m} \times$   
195  $0.32 \text{ mm} \times 0.25 \text{ }\mu\text{m}$ ), and the column flow rate is set at  $1.0 \text{ mL}\cdot\text{min}^{-1}$ . The temperature of the  
196 injection port is  $220\text{ }^{\circ}\text{C}$ , the carrier gas is nitrogen, and the purge flow rate is  $3 \text{ mL}\cdot\text{min}^{-1}$ . The  
197 injection mode is split, with a split ratio of 30.0 and a linear velocity of  $18.5 \text{ cm}\cdot\text{sec}^{-1}$ , and the total  
198 flow rate is  $34.1 \text{ mL}\cdot\text{min}^{-1}$ . Detector temperature:  $300\text{ }^{\circ}\text{C}$ , and the make - up gas flow rate is  $30$   
199  $\text{mL}\cdot\text{min}^{-1}$ . Oven temperature program: The initial temperature is  $35\text{ }^{\circ}\text{C}$  and held for 5 min. Then,  
200 the temperature is increased to  $50\text{ }^{\circ}\text{C}$  at a rate of  $1\text{ }^{\circ}\text{C}\cdot\text{min}^{-1}$  and maintained for 12.5 min. The total  
201 sample measurement time is 32.5 min.

202 (2) HAA precursors in water samples were analyzed using a Waters Xevo TQ-S ultra-  
203 performance liquid chromatography-tandem mass spectrometer (UPLC-MS/MS), with an injection  
204 volume of 1 mL in 2-mL autosampler vials. The chromatograph was equipped with an ACQUITY  
205 UPLC HSS T3 column ( $1.8 \text{ }\mu\text{m}$ ,  $2.1 \text{ mm} \times 100 \text{ mm}$ ). The mobile phases were acetonitrile (A) and



206 0.05% formic acid in water (B). The mobile phase gradient was as follows: initially, A:B = 2:98;  
207 3.0–3.5 min: 20% A, 80% B; from 4.5 min, A:B = 90:10; from 6 min, A:B = 2:98. The flow rate  
208 was 0.4 mL·min<sup>-1</sup>, and the temperatures of the sample and the column were 10.0 °C and 30.0 °C,  
209 respectively. For the mass spectrometry conditions, the ionization mode was ES<sup>-</sup>, the source  
210 temperature was 150 °C, the desolvation gas temperature was 600 °C, the cone gas flow rate was  
211 150 L·h<sup>-1</sup>, the desolvation gas flow rate was 1000 L·h<sup>-1</sup>, and the nebulizer pressure was 7.0 Bar.

### 212 (3) Haloacetonitriles (HANs), Halogenated Nitromethane (HNMs) Precursors

213 For HAN and HNM precursor analysis, chlorinated water samples were quenched, and the pH  
214 was adjusted to 4.0. Subsequently, 1 g of anhydrous sodium sulfate, 10 mL of the aqueous sample,  
215 and 1 mL of methyl tert-butyl ether (MTBE) extractant were sequentially added to headspace vials,  
216 ensuring equal volumes of the aqueous and organic phases. Standard solutions were processed  
217 identically. The instrument used to detect the THMs and HNMs generated was the TQ8040 triple  
218 quadrupole gas chromatography-mass spectrometer manufactured by Shimadzu Corporation.

219 The chromatographic column used was Rtx - 5MS (60 m × 0.25 mm × 2.5 μm). The column  
220 flow rate was 1.2 mL·min<sup>-1</sup>. The injection mode was splitless injection, and the injection volume  
221 was 1 μL. The carrier gas was high - purity helium. The temperature programming was as follows:  
222 Initially, the temperature was maintained at 40 °C for 5 min. Then, the temperature was increased  
223 to 80 °C at a rate of 5 °C·min<sup>-1</sup> and maintained for 2 min. Finally, the temperature was increased to  
224 180 °C at a rate of 40 °C·min<sup>-1</sup> and held for 3 min. For the mass spectrometry conditions, the ion  
225 source mode was EI (70 eV). The temperatures of the ion source, the injection port, and the transfer  
226 line were 200 °C, 170 °C, and 200 °C, respectively. The solvent delay time was 6.8 min. The  
227 detector voltage was the tuning voltage + 0.4 kV. The scanning mode was set to the selected ion  
228 monitoring (SIM) mode.

229

## 230 8. Acute toxicity testing

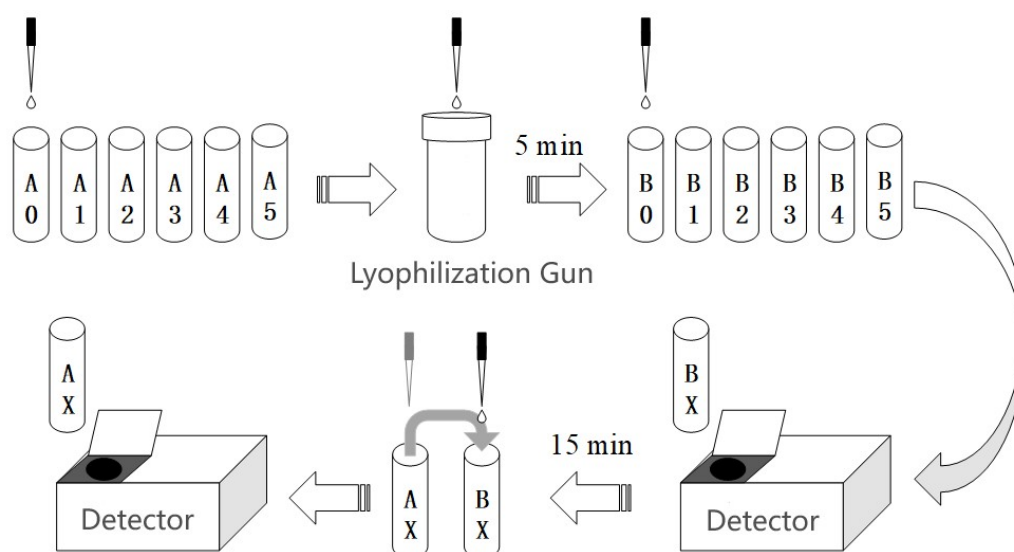

231  
232 Comprehensive Toxicity Testing Flowchart

233 *Vibrio fischeri* was employed to assess toxicity changes in solutions during AZT degradation  
234 by UV/PMS technology. The standards followed in the measurement process include the standards  
235 of the American Society for Testing and Materials (ASTM-D-5660) and the standards of the  
236 European Committee for Standardization (EN ISO 11348 - 3 - 2008), etc. The instrument used for  
237 the detection was GR-8500A portable toxicity analyzer. Before starting, the instrument was  
238 powered on and preheated for 60 s. The specific steps involved are shown in the figure.

239 (1) 1 mL of diluent and 0.1 mL of osmotic pressure adjusting solution were pipetted into tube  
240 A0. Then, add 1 mL of the corresponding water sample and 0.1 mL of the osmotic pressure  
241 regulating solution to tubes A1–A5 in sequence.

242 (2) Lyophilized *Vibrio fischeri* powder and diluent were removed from the freezer and  
243 refrigerator, respectively and the refrigerated layer of the refrigerator, respectively. Use a pipette to  
244 add 3.5 mL of the diluent to the vial containing the lyophilized powder. After mixing well, carry  
245 out a resuscitation procedure that takes 5 minutes. Then, take 0.5 mL of the rehydrated solution after  
246 resuscitation and add it to bottles B0–B5, respectively.

247 (3) On the instrument, click on the more accurate B-TOX mode. Detect the luminescence  
248 intensity of the bacteria in bottles B0–B5 respectively. After the detection is completed, click the  
249 "Finish" option, and the instrument will automatically start timing for 15 minutes.

250 (4) During the waiting period, use a pipette to take 0.5 mL of the liquid from the AX bottle

251 (where X corresponds to the numbers 0–5) and add it to the BX bottle.

252 (5) After the 15-minute timing is over, put B0–B5 into the instrument for detection

253 respectively.

254 (6) Query the test results and record them.

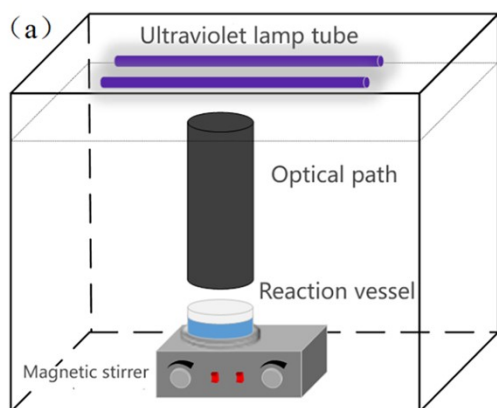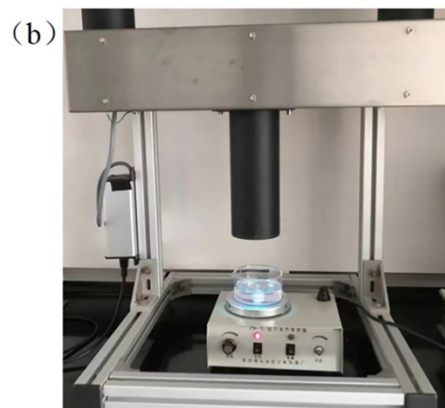

**Figure S1.** Schematic (a) and photographic (b) drawings of parallel beam device.

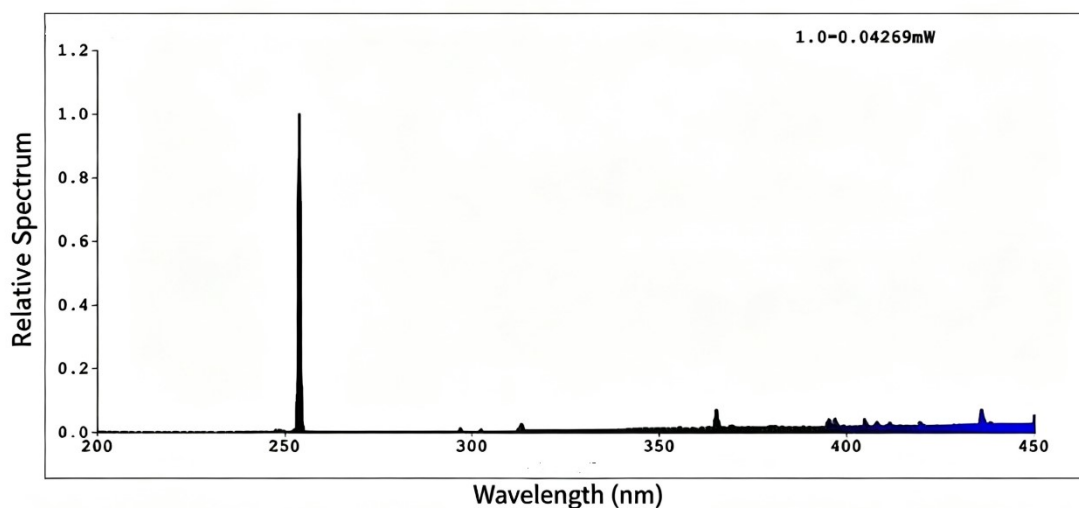

258 Peak Wavelength:  $\lambda_p = 253.8 \text{ nm}$  Half-Width:  $\lambda_d = 0.9 \text{ nm}$

259 **Figure S2.** Light Source Spectral Test Report

260

261

262

263

264

265

266

267

268

269

270

271

272

273

274

275

276

277

278

279

280

281

282

283

284

285

286

287

288  
289  
290  
291  
292  
293

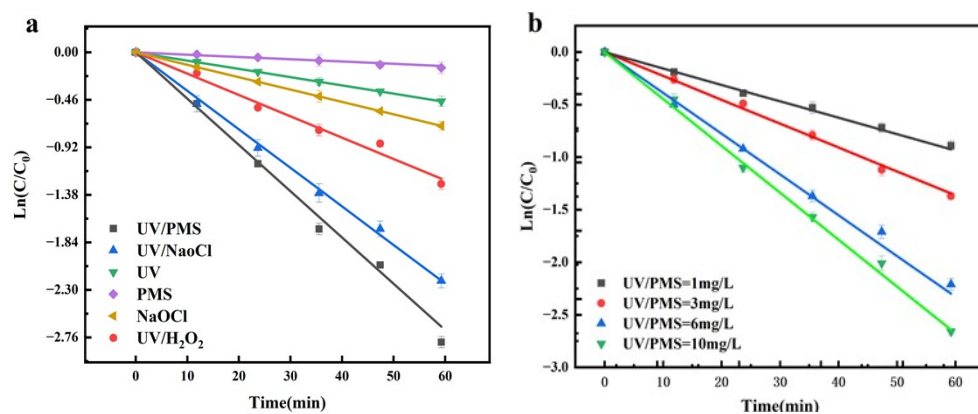

294  
295 **Figure S3.** Quasi-primary fitting curves of AZT degradation by different UV advanced oxidation  
296 techniques and quasi-primary fitting curves of AZT degradation under UV/PMS system.

297

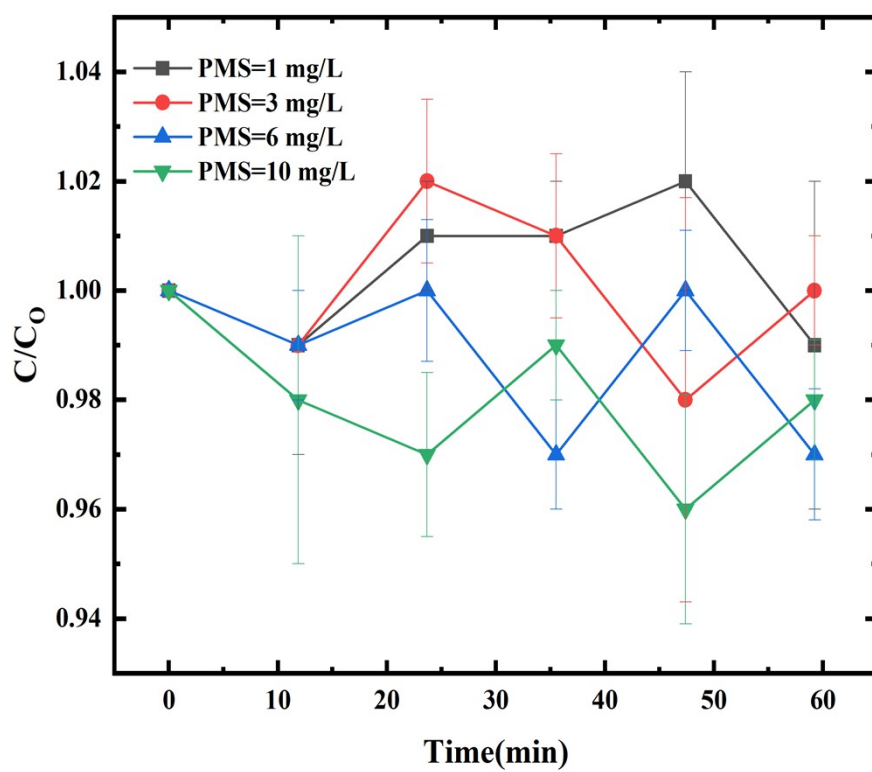

**Figure S4.** Removal of AZT in the PMS system

301

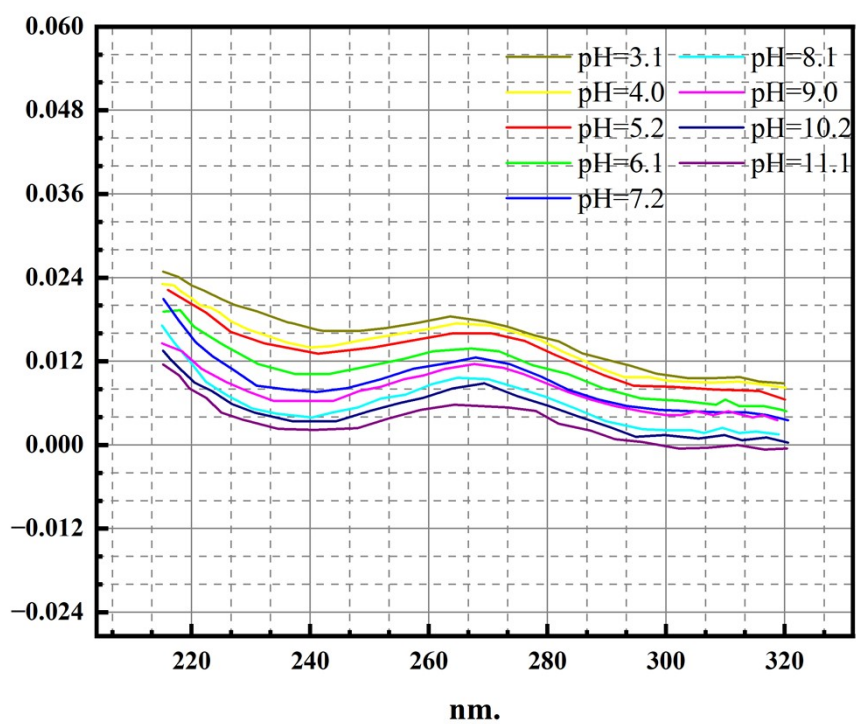

302

303

304

**Figure S5.** Variation of AZT absorbance at different pH with wavelength  $\lambda$

305



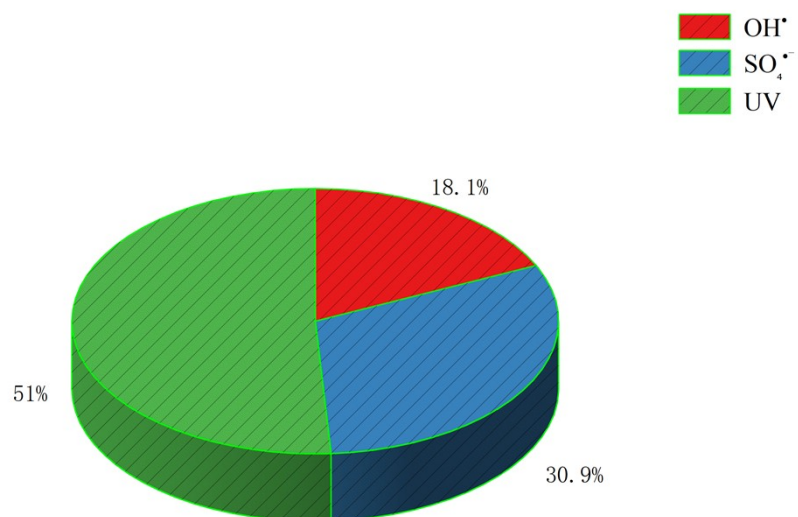

306

307

**Figure S6.** Contribution of SO<sub>4</sub>•<sup>-</sup>, OH•, and UV to AZT degradation in UV/PMS systems

308

309 **Table S1. Degradation rates of 4-MBC and EHMC by different advanced**  
310 **oxidation processes.**

| Process Type                         | Target Pollutants | Degradation Efficiency                                                                       |
|--------------------------------------|-------------------|----------------------------------------------------------------------------------------------|
| UV/PMS                               | 4-MBC/EHMC        | Ultra-pure water: 98% (EHMC, 200 mJ/cm <sup>2</sup> ); Natural water: 92% (EHMC, 0.3 mM PMS) |
| UV/H <sub>2</sub> O <sub>2</sub>     | 4-MBC/EHMC        | Ultra-pure water: 93% (EHMC); Natural water: 79% (0.3 mM H <sub>2</sub> O <sub>2</sub> )     |
| UV/PMS/H <sub>2</sub> O <sub>2</sub> | 4-MBC/EHMC        | Ultra-pure water: 98% (synergistic effect); Natural water: 74% (0.015 mM mixture)            |
| UV (control)                         | 4-MBC/EHMC        | Ultra-pure water: 53%; Natural water: 45% (1400 mJ/cm <sup>2</sup> )                         |

311  
312  
313  
314  
315  
316  
317  
318  
319  
320  
321  
322  
323  
324  
325  
326  
327  
328  
329  
330  
331  
332  
333  
334  
335  
336  
337  
338  
339  
340  
341  
342  
343  
344

345

346

347 **Table S2.** Experiment main target organic matter

| Name             | Molecular weight | Chemistry                                                                         | Norm                  | Provider                          | Dissociation Constant                                   | logKow         | Water Solubility   |
|------------------|------------------|-----------------------------------------------------------------------------------|-----------------------|-----------------------------------|---------------------------------------------------------|----------------|--------------------|
| Zidovudine (AZT) | (267.24)         | 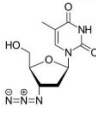 | $\geq 98\%$<br>(HPLC) | Aladdin Reagent<br>(Shanghai) Co. | $pK_{a1} \approx 2.6-2.8$<br>$pK_{a2} \approx 9.5-10.0$ | $\approx 0.05$ | 20 mg/mL<br>(25°C) |

348

| Name of experimental reagents                                                                                    | Specification/Model                 | Note                                 |
|------------------------------------------------------------------------------------------------------------------|-------------------------------------|--------------------------------------|
| Potassium peroxymonosulfate complex salt<br>( $2\text{HKSO}_5 \cdot \text{KHSO}_4 \cdot \text{K}_2\text{SO}_4$ ) | 42%~46% ( $\text{KHSO}_5$ metering) | Shanghai Eon Chemical Technology Co. |
| Disodium hydrogen phosphate dodecahydrate<br>( $\text{Na}_2\text{HPO}_4 \cdot 12\text{H}_2\text{O}$ )            | Analytical purity                   | Aladdin Reagent (Shanghai) Co.       |
| Sodium dihydrogen phosphate dihydrate<br>( $\text{NaH}_2\text{PO}_4 \cdot 2\text{H}_2\text{O}$ )                 | Analytical purity                   | Aladdin Reagent (Shanghai) Co.       |
| Sodium thiosulfate ( $\text{Na}_2\text{S}_2\text{O}_3$ )                                                         | Analytical purity                   | Tianjin Komeo                        |
| Hydrogen peroxide ( $\text{H}_2\text{O}_2$ )                                                                     | 30%                                 | Shanghai Guoyao                      |
| Sodium hypochlorite ( $\text{NaClO}$ )                                                                           | 22%                                 | Tianjin Komeo                        |
| Sodium chloride ( $\text{NaCl}$ )                                                                                | Analytical purity                   | Tianjin Komeo                        |
| Sodium bicarbonate<br>( $\text{NaHCO}_3$ )                                                                       | Analytical purity                   | Tianjin Komeo                        |
| Sodium nitrate ( $\text{NaNO}_3$ )                                                                               | Analytical purity Analytical purity | Shanghai Guoyao                      |
| Sodium Nitrite ( $\text{NaNO}_2$ )                                                                               | Analytical purity                   | Shanghai Guoyao                      |
| Humic acid (HA)                                                                                                  | $\geq 90\%$                         | Aladdin Reagent (Shanghai) Co.       |
| Methanol ( $\text{CH}_3\text{OH}$ )                                                                              | Chromatographic purity              | Merck KGaA                           |
| Trihalomethane standard                                                                                          | Chromatographic purity              | TEDIA                                |
| Haloacetonitrile standard product                                                                                | Chromatographic purity              | AccuStandard                         |
| Haloacetic acid standard product                                                                                 | Chromatographic purity              | Sigma-Aldrich                        |
| Halonitromethane standard product                                                                                | Chromatographic purity              | AccuStandard                         |
| Ascorbic acid ( $\text{C}_6\text{H}_8\text{O}_6$ )                                                               | Analytical purity                   | Shanghai Guoyao                      |

| Name of experimental reagents                                 | Specification/Model    | Note                                  |
|---------------------------------------------------------------|------------------------|---------------------------------------|
| Sodium hydroxide (NaOH)                                       | Analytical purity      | Shanghai Guoyao                       |
| Sulfuric acid (H <sub>2</sub> SO <sub>4</sub> )               | Analytical purity      | Shanghai Guoyao                       |
| Sodium sulfate anhydrous (Na <sub>2</sub> SO <sub>4</sub> )   | Analytical purity      | Shanghai Guoyao                       |
| Methyl tert-butyl ether (C <sub>5</sub> H <sub>12</sub> O)    | Analytical purity      | Shanghai Guoyao                       |
| Tert-butyl alcohol (C <sub>4</sub> H <sub>10</sub> O)         | Chromatographic purity | Aladdin Reagent (Shanghai) Co.        |
| Isopropyl alcohol (C <sub>3</sub> H <sub>8</sub> O)           | Chromatographic purity | Aladdin Reagent (Shanghai) Co.        |
| Nitrobenzene (C <sub>6</sub> H <sub>5</sub> NO <sub>2</sub> ) | Chromatographic purity | Aladdin Reagent (Shanghai) Co.        |
| Atrazine (C <sub>8</sub> H <sub>14</sub> ClN <sub>5</sub> )   | Chromatographic purity | Aladdin Reagent (Shanghai) Co.        |
| Dichloromethane (CH <sub>2</sub> Cl <sub>2</sub> )            | Chromatographic purity | Merck KGaA                            |
| Formic acid (CH <sub>2</sub> O <sub>2</sub> )                 | Chromatographic purity | Aladdin Reagent (Shanghai) Co.        |
| Acetonitrile (CH <sub>3</sub> CN)                             | Chromatographic purity | Merck KGaA                            |
| Vibrio fischeri lyophilized powder                            | LS100-QF100            | Beijing Zhongxi Yuanda Technology Co. |

352 **Table S4.** Main instruments and equipment

| Instruments or equipment                                                                     | Model number       | Manufacturer              |
|----------------------------------------------------------------------------------------------|--------------------|---------------------------|
| High Performance Liquid Chromatography                                                       | Waters Acquity Arc | Waters Corporation        |
| Constant Temperature Magnetic Stirrer                                                        | 85-2               | Changzhou Guohua Electric |
| Gas Chromatograph                                                                            | GC2010             | Shimadzu, Japan           |
| Gas Chromatograph                                                                            | 7890A              | Agilent, USA              |
| Gas Chromatography-Mass Spectrometer                                                         | Trace DSQ          | Thermo Fisher Scientific  |
| Triple Quadrupole Gas Chromatograph-Mass Spectrometer                                        | TQ8040             | Shimadzu, Japan           |
| Ultra High Pressure Liquid Chromatography-Quadrupole Tandem Time of Flight Mass Spectrometer | 1290UPLC /QTOF6550 | Agilent, USA              |

353

| Instruments or equipment                                                        | Model number | Manufacturer                       |
|---------------------------------------------------------------------------------|--------------|------------------------------------|
| Total Organic Carbon Tester                                                     | TOC-VCPH     | Shimadzu Corporation, Japan        |
| Ultra High Performance Liquid Chromatography-Triple QuadrupoleMass Spectrometer | XevoTQ-S     | Waters Corporation, USA            |
| Portable H <sub>2</sub> O <sub>2</sub> Concentration Detector                   | GDYS-102SC   | Changchun Jida Swan Instrument Co. |
| Liquid Phase Organic Carbon Analyzer                                            | LC-OCD       | DOC-Labor Corporation              |
| Fluorescence Excitation-Emission Matrix Spectrometer                            | F-2700       | Hitachi, Japan                     |
| Ultraviolet irradiation                                                         | ILT 2400     | International Light                |

|                                           |                 |                                                    |
|-------------------------------------------|-----------------|----------------------------------------------------|
| intensity meter                           |                 | Technologies, USA                                  |
| Portable Residual Chlorine<br>Meter       | AQ3070          | ThermoFisher, USA                                  |
| Electronic Analytical<br>Balance          | MS204S/01       | Mettler Toledo, Switzerland                        |
| Automatic Solid Phase<br>Extractor        | Auto SPE 06PLUS | China Ruike Instrument Co.                         |
| pH meter                                  | FE28            | Mettler Toledo, Switzerland                        |
| Turbidity meter                           | 2100N           | Hash Corporation, USA                              |
| Conductivity meter                        | DDS-307A        | Shanghai Lei Magnetic<br>Instrument Factory, China |
| UV Spectrophotometer                      | UV-2700         | Shimadzu Corporation,<br>Japan                     |
| Portable Comprehensive<br>Toxicity Tester | GR-8500A        | Hangzhou Lujie Water<br>Technology Co.             |
| Digital Blast Drying Oven                 | DDS-307A        | Shanghai Lei magnetic<br>Instrument Factory, China |

354

355 **Table S5.** L16(42)Orthogonal design and results table

|                | A:PMS concentration        | B:UV dose                   | A*B | Removal rate |
|----------------|----------------------------|-----------------------------|-----|--------------|
| 1              | 1 (1 mg·L <sup>-1</sup> )  | 1(200 mJ·cm <sup>-2</sup> ) | 1   | 32.29%       |
| 2              | 1                          | 2(300 mJ·cm <sup>-2</sup> ) | 2   | 41.14%       |
| 3              | 1                          | 3(400 mJ·cm <sup>-2</sup> ) | 3   | 47.68%       |
| 4              | 1                          | 4(500 mJ·cm <sup>-2</sup> ) | 4   | 58.93%       |
| 5              | 2 (3 mg·L <sup>-1</sup> )  | 1                           | 2   | 38.74%       |
| 6              | 2                          | 2                           | 1   | 54.62%       |
| 7              | 2                          | 3                           | 4   | 67.37%       |
| 8              | 2                          | 4                           | 3   | 74.59%       |
| 9              | 3 (6 mg·L <sup>-1</sup> )  | 1                           | 3   | 60.15%       |
| 10             | 3                          | 2                           | 4   | 74.59%       |
| 11             | 3                          | 3                           | 1   | 81.91%       |
| 12             | 3                          | 4                           | 2   | 89.03%       |
| 13             | 4 (10 mg·L <sup>-1</sup> ) | 1                           | 4   | 66.80%       |
| 14             | 4                          | 2                           | 3   | 79.29%       |
| 15             | 4                          | 3                           | 2   | 86.59%       |
| 16             | 4                          | 4                           | 1   | 92.99%       |
| K <sub>1</sub> | 45.01                      | 49.50                       |     |              |
| K <sub>2</sub> | 58.83                      | 62.41                       |     |              |
| K <sub>3</sub> | 76.42                      | 58.62                       |     |              |
| K <sub>4</sub> | 81.42                      | 78.89                       |     |              |
| R              | 36.41                      | 29.39                       |     |              |

356



357 **Table S6.** Water quality parameters of filtered water effluent

| Water quality parameters<br>(units)                              | Filtered water |
|------------------------------------------------------------------|----------------|
| Temperature ( °C )                                               | 23             |
| pH                                                               | 8.27           |
| UV <sub>254</sub> (cm <sup>-1</sup> )                            | 0.031          |
| DOC(mg·L <sup>-1</sup> )                                         | 2.205          |
| Turbidity ( NTU )                                                | 0.206          |
| Total hardness (as<br>CaCO <sub>3</sub> ) ( mg·L <sup>-1</sup> ) | 239            |
| Electrical conductivity ( μs·cm <sup>-1</sup> )                  | 886            |
| Ammonia nitrogen ( mg·L <sup>-1</sup> )                          | 0.06           |
| Nitrate (as N) ( mg·L <sup>-1</sup> )                            | 2.06           |
| Nitrite (as N) ( mg·L <sup>-1</sup> )                            | <0.005         |
| Chloride ( mg·L <sup>-1</sup> )                                  | 97.1           |
| Sulfate ( mg·L <sup>-1</sup> )                                   | 209            |

358

359

360

361

362

363

364

365

366

367

368

369

370

371

372

373

374

375

376

377

378

379

380

381 **Table S7.** Degradation products

| Nicknames | Mass-to-charge<br>ratio<br>measurements | Theoretical<br>value of mass-<br>to-charge ratio | Misalignment(ppm) | Predicting the<br>original structure                                                  |
|-----------|-----------------------------------------|--------------------------------------------------|-------------------|---------------------------------------------------------------------------------------|
| AZT-1     | 268.1053                                | 268.1040                                         | 4.85              | 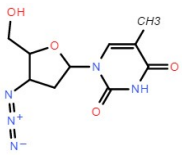   |
| AZT-2     | 290.0872                                | 290.0860                                         | 4.14              |    |
| AZT-3     | 306.0608                                | 306.0599                                         | 2.91              |   |
| DP127     | 127.0510                                | 127.0502                                         | 6.30              |  |
| DP239(a)  | 239.0916                                | 239.0912                                         | 1.67              |  |
| DP239(b)  | 239.0916                                | 239.0912                                         | 1.67              |  |
| DP223     | 223.0725                                | 223.0724                                         | 0.45              |  |
| DP185     | 185.0667                                | 185.0680                                         | -7.02             |  |
| DP125     | 125.0355                                | 125.0357                                         | -1.6              |  |

382

383 **Table S8.** Signal intensity

| Nicknames | 0 min<br>Abund<br>( Counts ) | 30 min<br>Abund<br>( Counts ) | 60 min<br>Abund<br>( Counts ) |
|-----------|------------------------------|-------------------------------|-------------------------------|
| AZT-1     | 247961                       | 89253                         | 34438                         |
| AZT-2     | 28658                        | 9876                          | 4073                          |
| AZT-3     | 3395                         | 1124                          | 529                           |
| DP127     | Not<br>observed              | 678                           | 1356                          |
| DP239(a)  | Not<br>observed              | 1239                          | 979                           |
| DP239(b)  | Not<br>observed              | 1187                          | 921                           |
| DP223     | Not<br>observed              | 19188                         | 1789                          |
| DP185     | Not<br>observed              | 539                           | 1338                          |
| DP125     | Not<br>observed              | 1338                          | 2676                          |

384  
385  
386  
387  
388  
389  
390  
391  
392  
393  
394  
395  
396  
397  
398  
399  
400  
401  
402  
403  
404

405 **Table S9.** Toxicity classifications and ranges (based on GHS)

| Toxicity range (mg·L <sup>-1</sup> )             | Hierarchy       |
|--------------------------------------------------|-----------------|
| LC <sub>50</sub> /EC <sub>50</sub> /ChV≤1        | Extremely toxic |
| 1 < LC <sub>50</sub> /EC <sub>50</sub> /ChV≤10   | Toxic           |
| 10 < LC <sub>50</sub> /EC <sub>50</sub> /ChV≤100 | Harmful         |
| LC <sub>50</sub> /EC <sub>50</sub> /ChV > 100    | Harmless        |

406

407 **Table S10.** AZT and its products log KOW, acute toxicity, chronic toxicity assessment values  
 408 (based on ECOSAR software)

|              | log<br>KOW | Acute toxicity : mg·L <sup>-1</sup> |                          |                                  | Chronic toxicity : mg·L <sup>-1</sup> |                        |                      |
|--------------|------------|-------------------------------------|--------------------------|----------------------------------|---------------------------------------|------------------------|----------------------|
|              |            | Fish<br>(LC <sub>50</sub> )         | Flea (LC <sub>50</sub> ) | Chlorella<br>(EC <sub>50</sub> ) | Fish<br>(ChV)                         | Flea<br>(ChV)          | Chlorella<br>a (ChV) |
| AZT          | -7.051     | 3.67×10 <sup>6</sup> *              | 7.3×10 <sup>9</sup> *    | 0.020                            | 2.71×10 <sup>4</sup>                  | 4.93×10 <sup>5</sup>   | 0.005                |
| DP239<br>(a) | -2.331     | 114.011                             | 1126.008                 | 0.018                            | 12.514 !                              | 90.825 !               | 0.005                |
| DP239<br>(b) | -1.295     | 2017.275                            | 16193.001                | 0.018                            | 14.609                                | 78.073                 | 0.005                |
| DP223        | -0.791     | 19.295                              | 4742.681                 | 0.017                            | 2.690 !                               | 34.310                 | 0.005                |
| DP185        | -8.087     | 9.14×10 <sup>8</sup> *              | 3.95×10 <sup>10</sup> *  | 3.26×10 <sup>6</sup> *           | 38896.162                             | 7.56×10 <sup>6</sup> * | 43481.133            |
| DP125        | -0.32      | 383.824                             | 901.557                  | 0.009                            | 2.193                                 | 9.552                  | 0.003                |

409

410

411 **References**

- 412 1. Hong W, Zou J, Zhao M, Yan S, Song WJES, Technology. Development of a five-chemical-probe  
413 method to determine multiple radicals simultaneously in hydroxyl and sulfate radical-mediated advanced  
414 oxidation processes. *Environmental Science & Technology*. 2024;58(12):5616-26.
- 415 2. Xu R-Z, Cao J-S, Feng G, Luo J-Y, Feng Q, Ni B-J, et al. Fast identification of fluorescent  
416 components in three-dimensional excitation-emission matrix fluorescence spectra via deep learning.  
417 *Chemical Engineering Journal*. 2022;430:132893.
- 418 3. Bougeard CM, Goslan EH, Jefferson B, Parsons SAJWr. Comparison of the disinfection by-product  
419 formation potential of treated waters exposed to chlorine and monochloramine. *Water Research*.  
420 2010;44(3):729-40.

421
